# Supplementary material for: Covalent functionalization of Sb2S3 with poly(N-vinylcarbazole) for solid-state broadband laser protection
Source: Royal Society of Chemistry journal article supplement (doi:10.1039/d3cc03712f), 2023-01-01
Supplement: d3cc03712f1.pdf [file d3cc03712f1.pdf]

## Covalent Functionalization of $\text{Sb}_2\text{S}_3$ with Poly(N-vinylcarbazole) for Solid-State Broadband Laser Protection

Guangwei Li<sup>a</sup>, Ningning Dong,<sup>b,d</sup> Xinzhu Wang<sup>c\*</sup>, Xibing Sheng<sup>a</sup>, Jun Wang,<sup>\*b,d</sup> Yu Chen<sup>\*a</sup>

<sup>a</sup>Key Laboratory for Advanced Materials, Institute of Applied Chemistry, East China University of Science and Technology, 130 Meilong Road, Shanghai 200237, China. Email: 3148704620@qq.com

<sup>b</sup>Photonic Integrated Circuits Center, Key Laboratory of Materials for High-Power Laser, Shanghai Institute of Optics and Fine Mechanics, Chinese Academy of Sciences, Shanghai 201800, China. Email: jwang@siom.ac.cn

<sup>c</sup>Chongqing Key Laboratory of Heterogeneous Materials Mechanics, College of Aerospace Engineering, Chongqing University, Chongqing 400040, China.

<sup>d</sup>Center of Materials Science and Optoelectronics, University of Chinese Academy of Sciences, Beijing 100049, China

### Experimental Section

**General :** All reactions were carried out under dry nitrogen atmosphere by using standard Schlenk techniques. Organic solvents were purified, dried and distilled under dry nitrogen. The  $\text{Sb}_2\text{S}_3$  nanosheets was prepared according to the literature.<sup>1</sup> Ultraviolet/visible (UV/Vis) absorption spectra were measured on a Shimadzu UV-2540 spectrophotometer. The TEM images were recorded on a JEOL JEM-2100 instrument. TGA was carried out on a Perkin–Elmer Pyris 1 thermogravimetric analyzer with a  $\text{N}_2$  flow rate of  $40 \text{ mL min}^{-1}$  at a heating rate of  $10 \text{ }^\circ\text{C min}^{-1}$ . A HORIBA JOBIN YVON Fluoromax-4 spectrofluorometer was used to record the steady-state fluorescence spectra. All samples for the fluorescence measurement were dissolved in water and/or dry organic solvent, filtered, transferred to a long quartz cell, and then capped and bubbled with dry nitrogen for 15 min. Raman spectra were recorded on an Invia/Reflrx Laser Micro-Raman spectrometer (Renishaw, England) with excitation laser beam wavelength of 532 nm.

The NLO and OL performances of the materials were investigated through a standard open-aperture Z-scan apparatus with 6 ns pulses from a Q-switched Nd:YAG

laser at 1064 nm and its second harmonic at 532 nm. The laser beam was focused with a 15 cm lens. For the PMMA-based films, the repetition rate was set to 2 Hz.

**Sb<sub>2</sub>S<sub>3</sub> functionalized with mercaptoethanol (Sb<sub>2</sub>S<sub>3</sub>-ME).** Sb<sub>2</sub>S<sub>3</sub> nanosheets (100 mg) were added into 50 mL of DMF, and then were bath-sonicated for 40 min to give a well-dispersed solution. To the above solution was added 5 mL of mercaptoethanol under stirring, followed by heating at 130 °C for 24 h in the dark under nitrogen atmosphere. After removing the residual mercaptoethanol by vacuum distillation, the obtained Sb<sub>2</sub>S<sub>3</sub> -ME was re-dispersed into 40 mL of DMF.

**Preparation of Sb<sub>2</sub>S<sub>3</sub> -DDAT as the RAFT agent.** To the solution of Sb<sub>2</sub>S<sub>3</sub> -ME (40 mL) in DMF was added a mixture of DDAT (9.1 g) and *N, N'*-dimethylaminopyridine (DMAP, 1.84 g). After stirring at 0 °C for 1h, 1,3-dicyclohexylcarbodiimide (DCC, 5.19 g) was added to the above solution, followed by reaction for an additional 48h at room temperature. Then the reaction mixture was poured into 300 mL of methanol and vacuum-filtered through a polycarbonate film (φ0.22 μm). The collected product was washed with ethanol, deionized water and THF, respectively, to remove any adsorbed unreacted DDAT. 128 mg of Sb<sub>2</sub>S<sub>3</sub> -DDAT after dryness under vacuum at 40°C for 24h was obtained.

**Preparation of PVK-Sb<sub>2</sub>S<sub>3</sub> via RAFT polymerization.** Polymerization reaction was carried out under highly purified dry nitrogen by use of standard Schlenk tube. A degassed mixture of Sb<sub>2</sub>S<sub>3</sub> -DDAT (100 mg) as RAFT agent, *N*-vinylcarbazole (NVC, 200 mg, before use, it was recrystallized twice from methanol at 40 °C, freeze-dried, and stored in vacuum in the dark), AIBN (4 mg) as initiator was heated in a water bath of 75 °C in a ultrasonic generator for 4 h under ultrasonic irradiation. After completion of the reaction, the mixture was allowed to cool to room temperature. The crude product was dissolved in DMF and dropped into 80 mL of methanol, followed by a vacuum-filtering through a polycarbonate film (φ0.22 μm). The collected solid product was washed with a large amount of CH<sub>2</sub>Cl<sub>2</sub> to remove any possible unreacted monomer and soluble free PVK polymer (if any) trapped in the resultant product. The product was further purified by Soxhlet extraction with acetone. After drying in vacuum at 50 °C for 6 hours, 184 mg of PVK-Sb<sub>2</sub>S<sub>3</sub> powder was obtained.

### Preparation of PVK via RAFT polymerization

Polymerization reaction was carried out under highly purified dry nitrogen by the use of a standard Schlenk tube. A degassed mixture of DDAT (10 mg) as the RAFT agent, N-vinylcarazole (200 mg), and AIBN (3 mg) as the initiator was heated in a water bath of 75 °C in a ultrasonic generator for 4 h under ultrasonic irradiation. After completion of the reaction, the mixture was allowed to cool to room temperature. The crude product was dissolved in CH<sub>2</sub>Cl<sub>2</sub> and dropped into 120 mL of methanol. This process repeated for at least three times to remove any possible unreacted monomer and initiator. After drying in a vacuum at 50 °C for 6 hours, 191mg of PVK powder was obtained.

**Preparation of PMMA-based films :** The sample (Sb<sub>2</sub>S<sub>3</sub> nanosheets, Sb<sub>2</sub>S<sub>3</sub>-PVK, the Sb<sub>2</sub>S<sub>3</sub>:PVK blends) was added to a cyclohexanone solution of PMMA (100 g.L<sup>-1</sup>) at a partial concentration ~0.5 g.L<sup>-1</sup> for Sb<sub>2</sub>S<sub>3</sub>-PVK, and ~ 1g.L<sup>-1</sup> for both the Sb<sub>2</sub>S<sub>3</sub> nanosheets and Sb<sub>2</sub>S<sub>3</sub>:PVK blends with a weight ratio of 1:1. This was followed by sonic agitation until a well-dispersed solution was formed. By using multilayer conventional spin casting technique, we achieved PMMA-based films which were further dried at 60°C for 24 h under high vacuum to remove any possible residual organic solvent before NLO measurements.

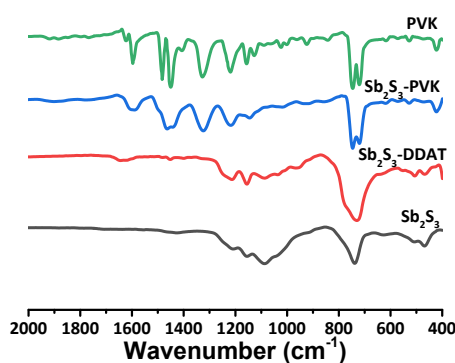

Figure S1. FTIR spectra of the samples.

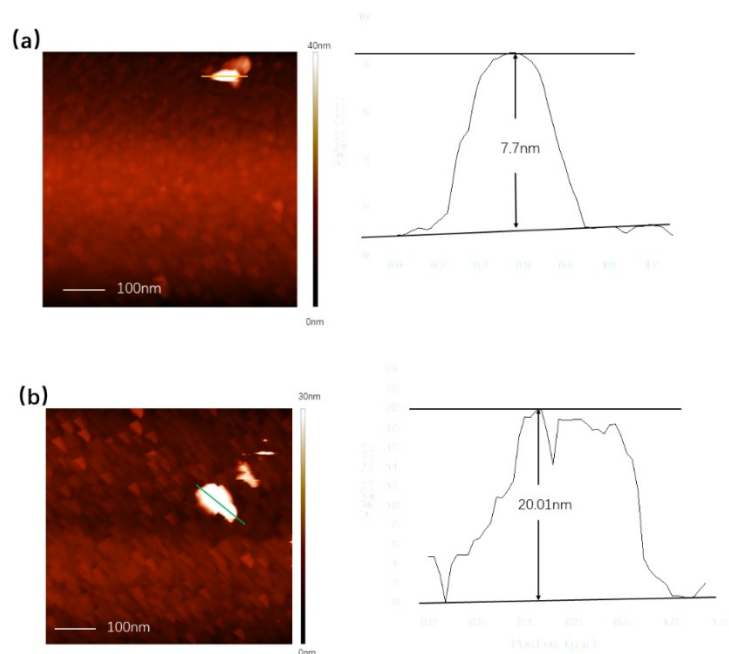

Figure S2.

AFM images of (a) few-layer  $\text{Sb}_2\text{S}_3$  nanosheets and (b)  $\text{Sb}_2\text{S}_3$ -PVK.

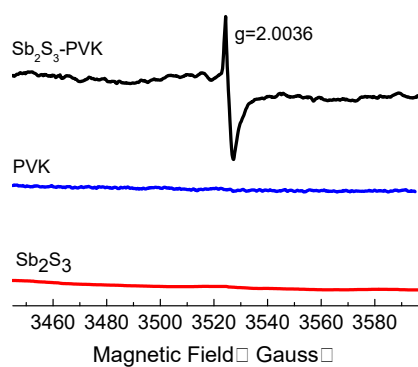

Figure S3. EPR spectra of the samples.

**Table S1.** Linear and NLO data of the samples.  $E_I$ : input pulse energy;  $T_0$ : linear transmittance;  $\alpha_0$ : linear absorption coefficient;  $\beta_{\text{eff}}$ : nonlinear coefficient;  $\text{Im}\chi^{(3)}$ : imaginary third-order susceptibility.

| Laser           | $E_I$             | PMMA-based Films                      | $T_0$<br>(%) | $\alpha_0$<br>( $\text{cm}^{-1}$ ) | $\beta_{\text{eff}}$<br>( $\text{cm/GW}$ ) | $\text{Im}\chi^{(3)}$<br>( $\times 10^{-12}$ , esu) |
|-----------------|-------------------|---------------------------------------|--------------|------------------------------------|--------------------------------------------|-----------------------------------------------------|
| 532 nm<br>2 Hz  | 300 $\mu\text{J}$ | $\text{Sb}_2\text{S}_3$               | 63.31        | 48.85                              | 98.97                                      | 42.26                                               |
|                 |                   | $\text{Sb}_2\text{S}_3$ :PVK blends   | 76.75        | 28.63                              | 110.30                                     | 47.09                                               |
|                 |                   | $\text{Sb}_2\text{S}_3$ -PVK          | 69.95        | 33.68                              | 411.79                                     | 175.83                                              |
|                 |                   | Annealed $\text{Sb}_2\text{S}_3$ -PVK | 72.04        | 40.31                              | 478.037                                    | 204.12                                              |
| 1064 nm<br>2 Hz | 500 $\mu\text{J}$ | $\text{Sb}_2\text{S}_3$               | 63.31        | 48.85                              | -15.94                                     | -13.62                                              |
|                 |                   | $\text{Sb}_2\text{S}_3$ :PVK blends   | 76.75        | 28.63                              | 107.37                                     | 91.80                                               |
|                 |                   | $\text{Sb}_2\text{S}_3$ -PVK          | 69.95        | 33.68                              | 242.79                                     | 207.58                                              |
|                 |                   | Annealed $\text{Sb}_2\text{S}_3$ -PVK | 72.04        | 40.31                              | 520.921                                    | 445.39                                              |

## References

- [1] C. Wu , C. Zhao, L. Wang, Z. Xie, Z. Wang, S. Zhou, *ACS Appl. Nano Mater.* **2021**, *4*, 13425-13431.
